# Supplementary material for: Label-free density-based detection of adipocytes of bone marrow origin using magnetic levitation
Source: Royal Society of Chemistry journal article supplement (doi:10.1039/c8an02503g), 2019-01-01

## **Label-Free Density-Based Detection of Adipocytes of Bone Marrow Origin Using Magnetic Levitation**

Oyku Sarigil <sup>1,†</sup>, Muge Anil-Inevi <sup>1,†</sup>, Esra Yilmaz <sup>1</sup>, Gulistan Mese <sup>2</sup>, H. Cumhur Tekin <sup>1</sup>, Engin Ozcivici <sup>1,\*</sup>

*<sup>1</sup>Department of Bioengineering*

*<sup>2</sup>Department of Molecular Biology and Genetics*

*†equal contribution*

*Izmir Institute of Technology*

*Urla, Izmir, Turkey*

### **\* Correspondence to:**

Engin Ozcivici, Ph.D.

Department of Bioengineering, Rm A210

Izmir Institute of Technology

Urla, Izmir, 35430

Turkey

Phone: + 90 232 750 7385

Fax: + 90 232 750 7603

e-mail: [enginozcivici@iyte.edu.tr](mailto:enginozcivici@iyte.edu.tr)

## Figure captions

**Supplementary Figure S1.** Levitation heights of beads with different densities (1, 1.02 and 1.09 g/mL) at 25, 50 and 100 mM  $Gd^{3+}$  containing medium. Data are presented as mean of replicates with error bars ( $\pm$ SD) and one-way ANOVA with Tukey's multiple comparisons test was performed for statistical analysis. Statistical significance was defined as \*:  $p < 0.05$ ; \*\*:  $p < 0.01$ ; \*\*\*:  $p < 0.001$ .

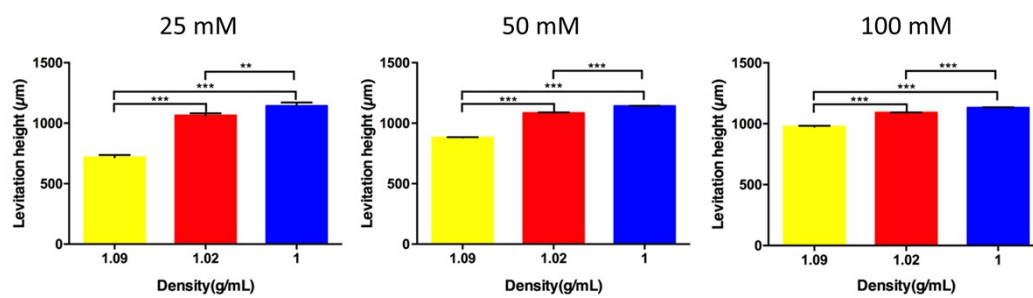

**Supplementary Figure S2.** Cell culture images of D1 ORL UVA cells that were cultured in standard growth medium and adipogenic differentiation medium over 15 days. Scale bar: 250  $\mu\text{m}$ .

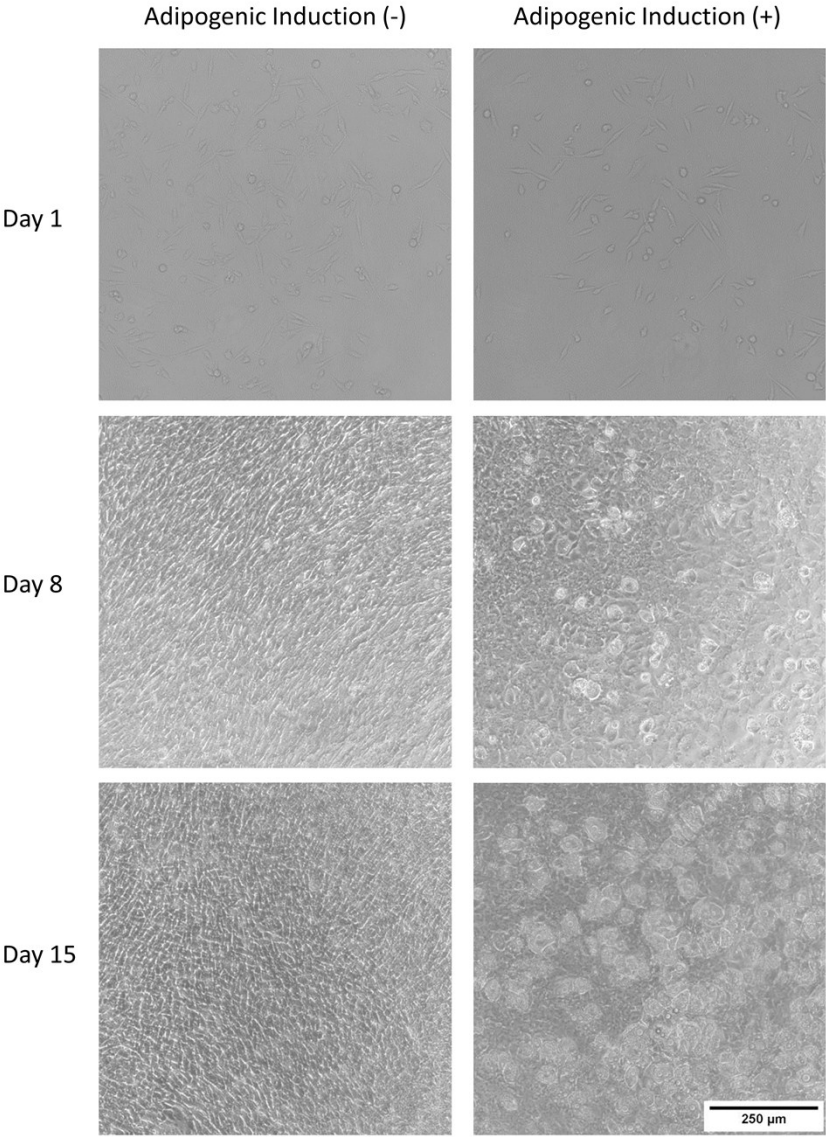

**Supplementary Figure S3.** Bright-field (A) and fluorescent (B) microscopy images of D1 ORL UVA cells cultured in growth or adipogenic differentiation medium at the 22<sup>nd</sup> day, in magnetic levitation device (25 mM Gd<sup>3+</sup>). Cell viability was visualized by live-dead (live: green, dead: red) staining. Dead cells were not detected in the system. Scale bar: 200  $\mu$ m.

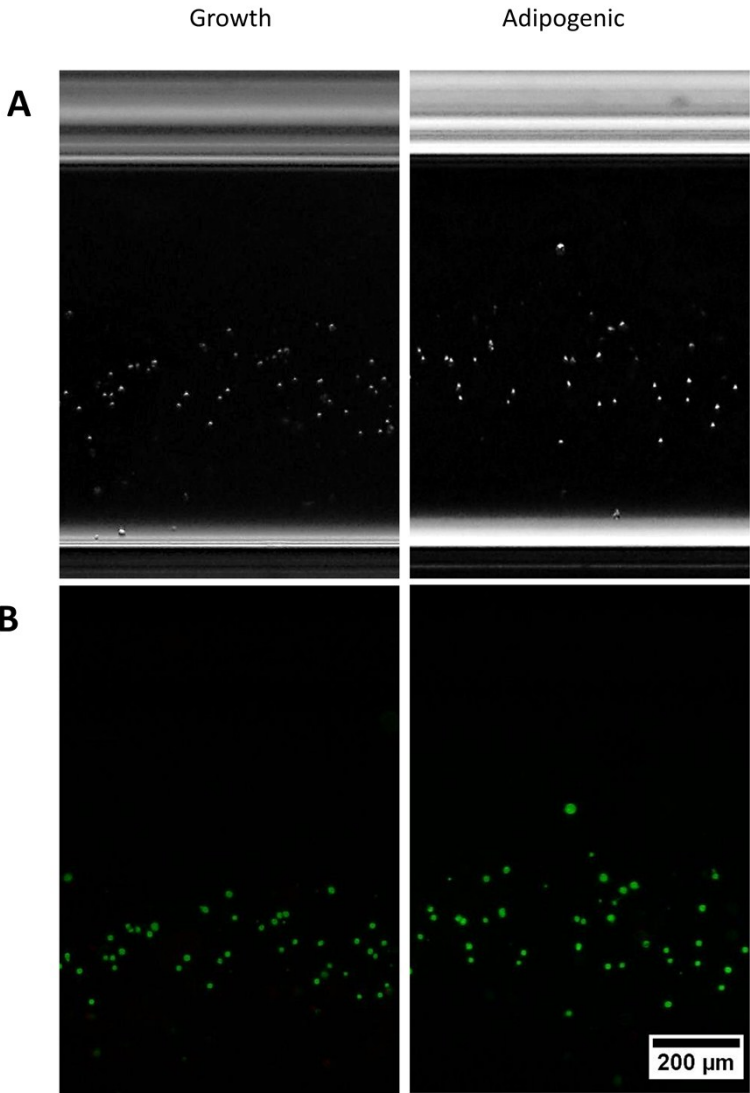

**Supplementary Figure S4.** Cell culture images of 7F2 cells that were cultured in standard growth medium and adipogenic medium for 10 days. Scale bar: 250  $\mu\text{m}$ .

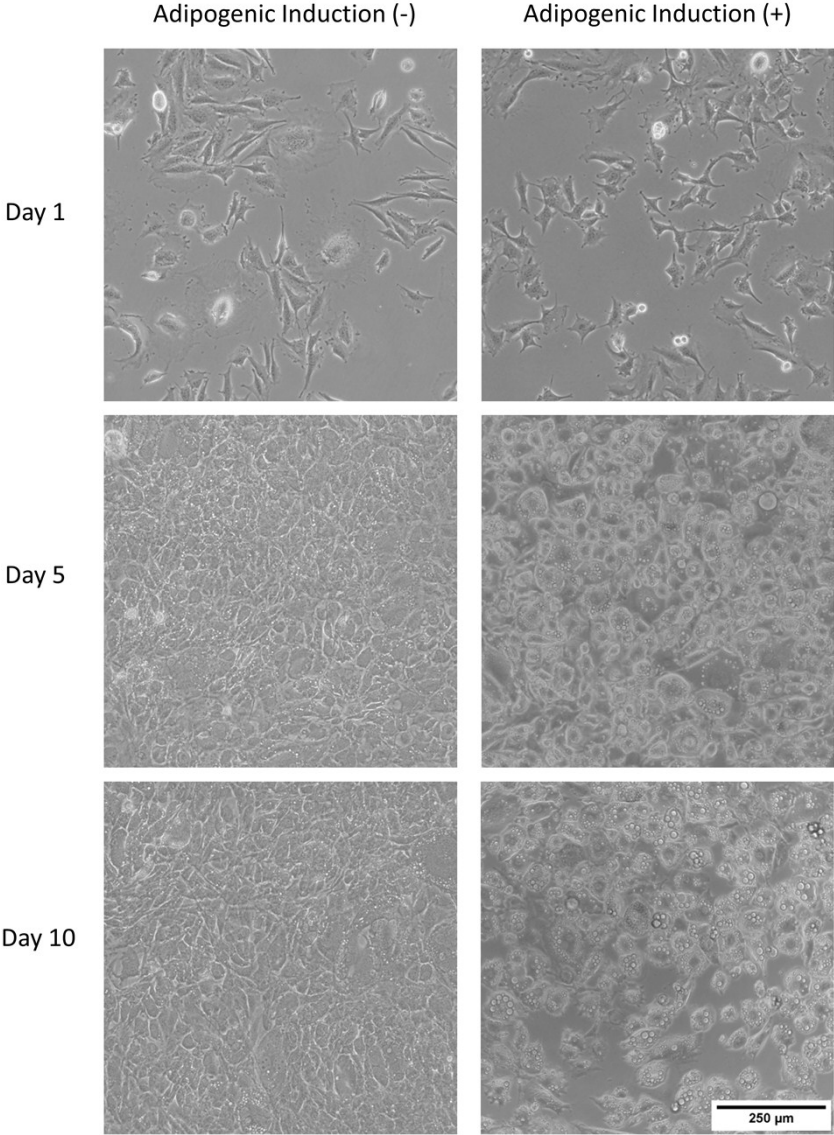

**Supplementary Figure S5.** Fluorescent images of the levitated heterogeneous populations consisted of quiescent D1 ORL UVA cells (green) and adipogenic differentiated 7F2 cells (red) at different ratios (50%, 25%, 10%, 5% and 1%) after 1, 5 and 10 day culture. Scale bar: 200  $\mu\text{m}$ .

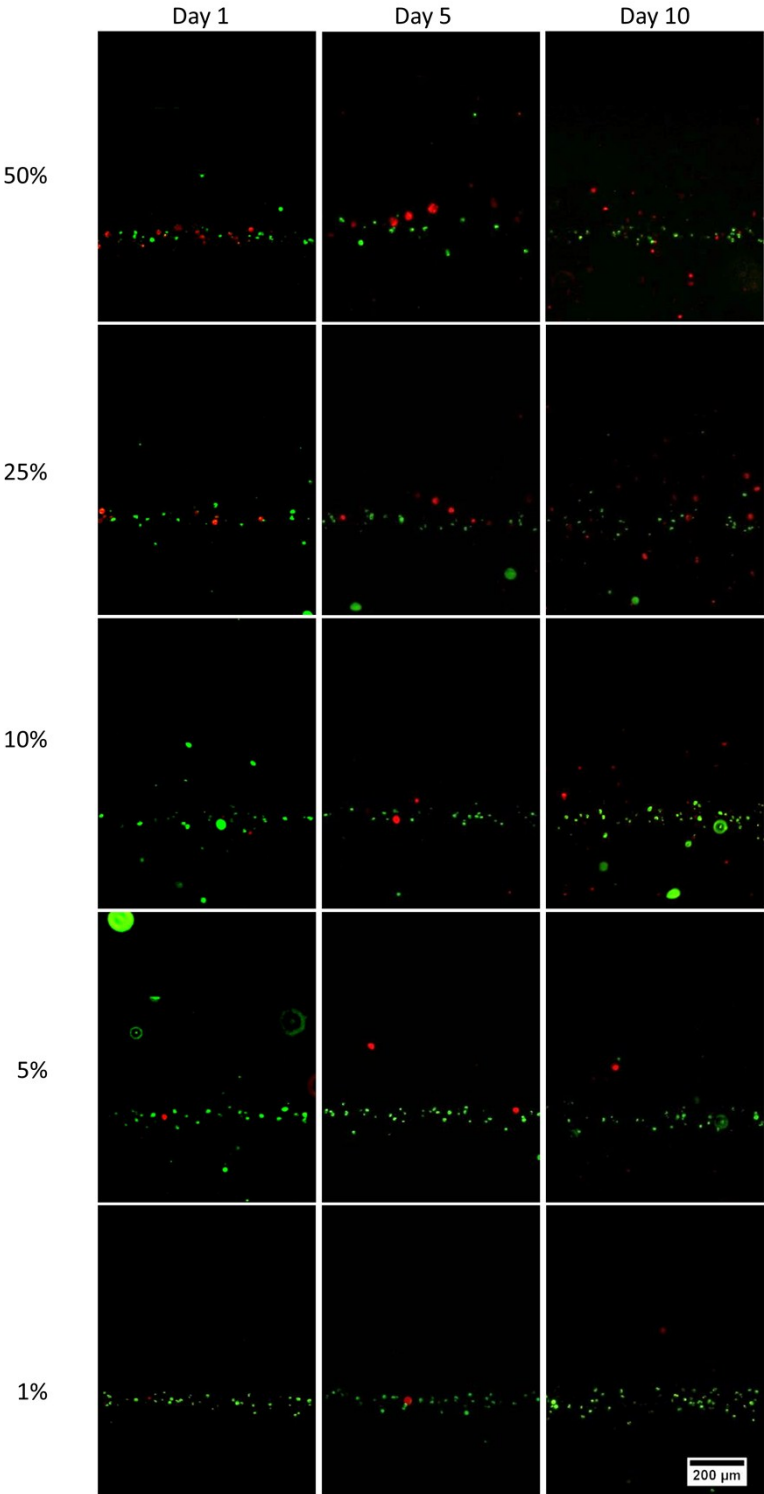

**Supplementary Figure S6.** Fluorescent images of the levitated heterogeneous population consist of undifferentiated 7F2 (red) cells and D1 ORL UVA (green) cells mixed at 50% ratio after 1, 5 and 10 day culture. Scale bar: 200  $\mu\text{m}$ .

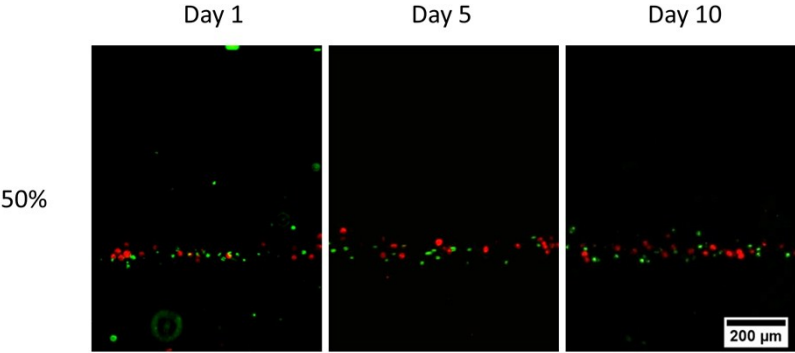

Supplement: c8an02503g1.pdf [file c8an02503g1.pdf]
